# Supplementary material for: Tropical forests are home to over half of the world’s vertebrate species
Source: PubMed Central journal article supplement — Front Ecol Environ. 2021 Oct 7;20(1):10–5. doi: 10.1002/fee.2420 (PMC9293027; doi:10.1002/fee.2420), 2021-10-07
Supplement: FEE-20-10-s001.pdf [file FEE-20-10-s001.pdf]

**R Pillay *et al.* – Supporting Information**

**WebTable 2. Data used to create Figure 1**

| <b>Taxonomic group</b> | <b># global species</b> | <b># tropical forest species (%)</b> | <b># tropical grassland species (%)</b> | <b># desert and xeric species (%)</b> | <b># temperate grassland species (%)</b> | <b># temperate forest species (%)</b> | <b># Mediterranean forest species (%)</b> |
|------------------------|-------------------------|--------------------------------------|-----------------------------------------|---------------------------------------|------------------------------------------|---------------------------------------|-------------------------------------------|
| Mammals                | 5529                    | 3480 (63)                            | 1433 (26)                               | 1102 (20)                             | 766 (14)                                 | 693 (13)                              | 387 (7)                                   |
| Birds                  | 10,935                  | 7918 (72)                            | 4603 (42)                               | 2376 (22)                             | 1808 (17)                                | 930 (9)                               | 570 (5)                                   |
| Reptiles               | 10,054                  | 4191 (42)                            | 1402 (14)                               | 1306 (13)                             | 630 (6)                                  | 402 (4)                               | 469 (5)                                   |
| Amphibians             | 7264                    | 5503 (76)                            | 1449 (20)                               | 283 (4)                               | 624 (9)                                  | 422 (6)                               | 214 (3)                                   |

**Notes:** numbers in parentheses represent the percentage of species in that category relative to the total number of global species. See Methods and WebTable 1 for the criteria for inclusion of species in each biome.
