# Supplementary material for: Tropical forests are home to over half of the world’s vertebrate species
Source: PubMed Central journal article supplement — Front Ecol Environ. 2021 Oct 7;20(1):10–5. doi: 10.1002/fee.2420 (PMC9293027; doi:10.1002/fee.2420), 2021-10-07
Supplement: FEE-20-10-s002.pdf [file FEE-20-10-s002.pdf]

**WebTable 5. Data used to create Figure 3, a and b**

| <b>Figure 3a. The percentage of tropical forest vertebrates occurring in the humid, dry, mangrove, and coniferous tropical forest biomes</b> |                                  |                                            |                                          |                                               |                                                 |
|----------------------------------------------------------------------------------------------------------------------------------------------|----------------------------------|--------------------------------------------|------------------------------------------|-----------------------------------------------|-------------------------------------------------|
| <b>Taxonomic group</b>                                                                                                                       | <b># tropical forest species</b> | <b># humid tropical forest species (%)</b> | <b># dry tropical forest species (%)</b> | <b># mangrove tropical forest species (%)</b> | <b># coniferous tropical forest species (%)</b> |
| Mammals                                                                                                                                      | 3480                             | 3327 (96)                                  | 1421 (41)                                | 1561 (45)                                     | 713 (20)                                        |
| Birds                                                                                                                                        | 7918                             | 7704 (97)                                  | 4149 (52)                                | 3976 (50)                                     | 1860 (23)                                       |
| Reptiles                                                                                                                                     | 4191                             | 3828 (91)                                  | 1917 (46)                                | 1601 (38)                                     | 829 (20)                                        |
| Amphibians                                                                                                                                   | 5503                             | 5298 (96)                                  | 1201 (22)                                | 1100 (20)                                     | 596 (11)                                        |

  

| <b>Figure 3b. The percentage of tropical forest vertebrates occurring in the Neotropic, Indomalayan, Afrotropic, and Australasia and Oceania biogeographic realms</b> |                                  |                                |                                  |                                 |                                              |
|-----------------------------------------------------------------------------------------------------------------------------------------------------------------------|----------------------------------|--------------------------------|----------------------------------|---------------------------------|----------------------------------------------|
| <b>Taxonomic group</b>                                                                                                                                                | <b># tropical forest species</b> | <b># Neotropic species (%)</b> | <b># Indomalayan species (%)</b> | <b># Afrotropic species (%)</b> | <b># Australasia and Oceania species (%)</b> |
| Mammals                                                                                                                                                               | 3480                             | 1243 (36)                      | 911 (26)                         | 856 (25)                        | 568 (16)                                     |
| Birds                                                                                                                                                                 | 7918                             | 3540 (45)                      | 1725 (22)                        | 1322 (17)                       | 1632 (21)                                    |
| Reptiles                                                                                                                                                              | 4191                             | 1872 (45)                      | 1174 (28)                        | 591 (14)                        | 607 (14)                                     |
| Amphibians                                                                                                                                                            | 5503                             | 2994 (54)                      | 1182 (21)                        | 819 (15)                        | 517 (9)                                      |

**Notes:** numbers in parentheses represent the percentage of species in that category relative to the total number of tropical forest species. Two ecoregions of the Palearctic realm and four ecoregions of the Nearctic realm fall within the tropical forest biome; these were pooled with the Indomalayan and Neotropic realms, respectively.
