# Supplementary material for: Tropical forests are home to over half of the world’s vertebrate species
Source: PubMed Central journal article supplement — Front Ecol Environ. 2021 Oct 7;20(1):10–5. doi: 10.1002/fee.2420 (PMC9293027; doi:10.1002/fee.2420), 2021-10-07
Supplement: FEE-20-10-s004.pdf [file FEE-20-10-s004.pdf]

## R Pillay *et al.* – Supporting Information

**WebTable 4. Data used to create Figure 2c**

| <b>Taxonomic group</b> | <b># migratory species occurring in the tropical forest biome</b> | <b># 100% wintering range overlap (% of migratory species)</b> | <b># 80–100% wintering range overlap (% of migratory species)</b> |
|------------------------|-------------------------------------------------------------------|----------------------------------------------------------------|-------------------------------------------------------------------|
| Birds                  | 643                                                               | 92 (14)                                                        | 219 (34)                                                          |

**Notes:** to classify a bird species as migratory, we only included species for which the “Non-breeding” attribute of the global range was populated with the number 3, indicating that the species is “known or thought very likely to occur regularly during the non-breeding season”. In the Eurasian and North American contexts, this encompasses “winter” (IUCN 2020). We calculated the overlap of this nonbreeding range with the tropical forest biome and filtered species by tropical forest habitat association as in the above steps to enumerate the number of species dependent on tropical forest in terms of wintering range.

### WebReferences

IUCN (International Union for Conservation of Nature). 2020. The IUCN Red List of Threatened Species (v2020-1). Gland, Switzerland: IUCN. [www.iucnredlist.org](http://www.iucnredlist.org). Viewed 20 Nov 2020.
