# Supplementary material for: Tropical forests are home to over half of the world’s vertebrate species
Source: PubMed Central journal article supplement — Front Ecol Environ. 2021 Oct 7;20(1):10–5. doi: 10.1002/fee.2420 (PMC9293027; doi:10.1002/fee.2420), 2021-10-07
Supplement: FEE-20-10-s007.pdf [file FEE-20-10-s007.pdf]

**R Pillay *et al.* – Supporting Information**

**WebTable 3. Data used to create Figure 2, a and b**

**Figure 2a. The percentage of global vertebrate species endemic to tropical forests based on 100% range overlap with the tropical forest biome and exclusive association with tropical forest habitats**

| <b>Taxonomic group</b> | <b># global species</b> | <b># 100% range overlap (%)</b> | <b># TH (%)</b> | <b># NT (%)</b> | <b># LC (%)</b> | <b># DD (%)</b> |
|------------------------|-------------------------|---------------------------------|-----------------|-----------------|-----------------|-----------------|
| Mammals                | 5529                    | 751 (14)                        | 300 (40)        | 32 (4)          | 208 (28)        | 211 (28)        |
| Birds                  | 10935                   | 855 (8)                         | 257 (30)        | 148 (17)        | 440 (51)        | 10 (1)          |
| Reptiles               | 10054                   | 1250 (12)                       | 315 (25)        | 78 (6)          | 500 (40)        | 357 (29)        |
| Amphibians             | 7264                    | 2393 (33)                       | 1017 (42)       | 127 (5)         | 577 (24)        | 672 (28)        |

**Figure 2b. The percentage of global vertebrate species endemic to tropical forests based on 80–100% range overlap with the tropical forest biome and exclusive association with tropical forest habitats**

| <b>Taxonomic group</b> | <b># global species</b> | <b># 80–100% range overlap (%)</b> | <b># TH (%)</b> | <b># NT (%)</b> | <b># LC (%)</b> | <b># DD (%)</b> |
|------------------------|-------------------------|------------------------------------|-----------------|-----------------|-----------------|-----------------|
| Mammals                | 5529                    | 1551 (28)                          | 495 (32)        | 89 (6)          | 644 (42)        | 323 (21)        |
| Birds                  | 10935                   | 2618 (24)                          | 512 (20)        | 405 (15)        | 1683 (64)       | 18 (1)          |
| Reptiles               | 10054                   | 2065 (21)                          | 480 (23)        | 125 (6)         | 991 (48)        | 469 (23)        |
| Amphibians             | 7264                    | 3219 (44)                          | 1257 (39)       | 177 (5)         | 1010 (31)       | 775 (24)        |

**Notes:** numbers in parentheses represent the percentage of species in that category relative to the total number of global species. See WebTable 1 for criteria for endemism. Species in the IUCN Critically Endangered (CR), Endangered (EN), and Vulnerable (VU) threat categories were collectively classified as Threatened (TH). Other categories include Near Threatened (NT), Least Concern (LC), and Data Deficient (DD).
